# Supplementary material for: Reprogramming human A375 amelanotic melanoma cells by catalase overexpression: Upregulation of antioxidant genes correlates with regression of melanoma malignancy and with malignant progression when downregulated
Source: PubMed Central journal article supplement (PMC5173049; doi:10.18632/oncotarget.9273), 2016-05-10
Supplement: oncotarget-07-41154-s001.pdf [file oncotarget-07-41154-s001.pdf]

# Reprogramming human A375 amelanotic melanoma cells by catalase overexpression: Upregulation of antioxidant genes correlates with regression of melanoma malignancy and with malignant progression when downregulated

## Supplementary Materials

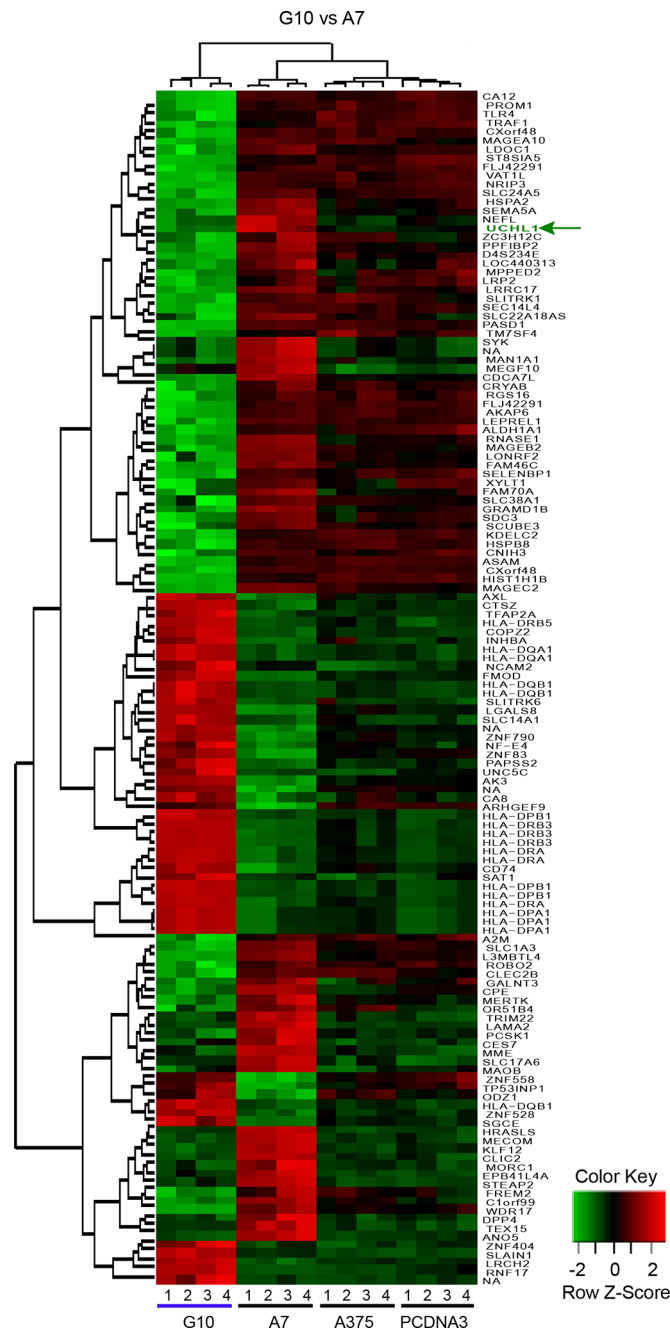

**Supplementary Figure S1: Differential gene expression and clustering analysis of upregulated and downregulated genes in G10 vs A7 cells.** Average result from A375 and PCDNA3 cells were used as control. Gene selected for qPCR analysis is indicated with green arrow. Analysis was conducted with  $lfc = 2$  and  $p \leq 0.0001$ . Key color: red for upregulated and green for downregulated genes.

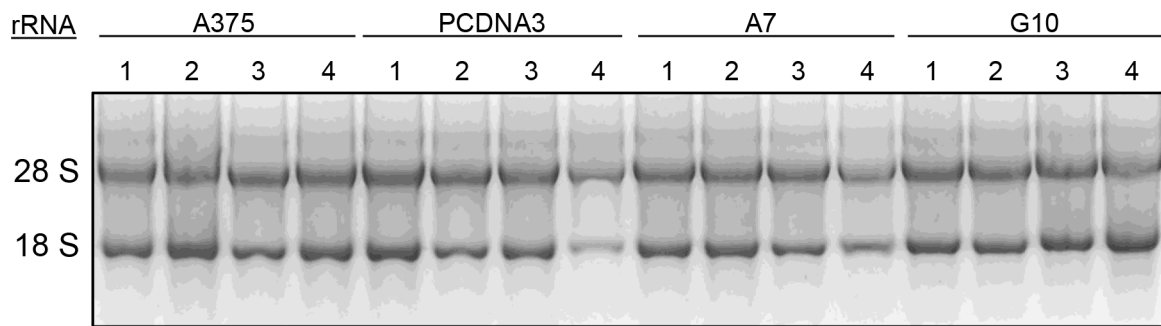

**Supplementary Figure S2: RNA integrity.** Agarose gel electrophoresis of total RNA samples. Image shows two bands corresponding to the ribosomal RNA (rRNA) subunits (28S and 18S) of total RNA extracted from A375, PCDNA3, A7 and G10 cells. Number indicates replicates samples.

**Supplementary Table S1: DAVID Functional Enrichment Analysis.** Up and Downregulation of coexpressed clustered genes defined a priori from KEGG and GO. Table shows clustered genes significantly enriched with a  $p$  Value < 0.01 and FDR (%) < 20. See Supplementary\_Table\_S1

**Supplementary Table S2: Significant processes obtained after DAVID analysis with their corresponding gene symbols and gene titles.** See Supplementary\_Table\_S2

**Supplementary Table S3: Gene Set Enrichment Analysis Report.** Up and Downregulation of coexpressed clustered genes defined a priori from KEGG and GO. Table shows clustered genes significantly enriched with a  $p$  Value < 0.05 and FDR (%) < 25. See Supplementary\_Table\_S3

**Supplementary Table S4: Significant processes obtained after GSEA analysis with their corresponding gene symbols and gene titles.** See Supplementary\_Table\_S4

**Supplementary Table S5: List of selected biological processes to analyze by GSEA.** See Supplementary\_Table\_S5

**Supplementary Table S6: List of 111 selected genes of the antioxidant system with their corresponding gene titles to analyze by GSEA.** See Supplementary\_Table\_S6

**Supplementary Table S7: List of selected melanoma prognostic signatures to analyze by GSEA**

| Melanoma Signature                                                                                                                                                                                                                                                                                                                                                                                                                                                                                                                                                                                                                                                                                                                                            | Reference                 |
|---------------------------------------------------------------------------------------------------------------------------------------------------------------------------------------------------------------------------------------------------------------------------------------------------------------------------------------------------------------------------------------------------------------------------------------------------------------------------------------------------------------------------------------------------------------------------------------------------------------------------------------------------------------------------------------------------------------------------------------------------------------|---------------------------|
| Up regulated genes in melanomas of patients with prolonged survival<br>Down regulated genes in melanomas of patients with prolonged survival                                                                                                                                                                                                                                                                                                                                                                                                                                                                                                                                                                                                                  | Bogunovic et al. 2009     |
| Up regulated genes in melanomas with high proliferative capacity and low metastatic capacity<br>Up regulated genes in melanomas with low proliferative capacity and with high metastatic capacity<br>Down regulated genes in melanomas with high proliferative capacity and low metastatic capacity<br>Down regulated genes in melanomas with low proliferative capacity and with high metastatic capacity                                                                                                                                                                                                                                                                                                                                                    | Hoek et al. 2006          |
| Up regulated genes in metastatic melanomas vs primary melanomas<br>Down regulated genes in metastatic melanomas vs primary melanomas<br>Down regulated genes in metastatic melanomas vs primary melanomas at a <i>p</i> value < 0.01<br>Down regulated genes in metastatic melanomas vs primary melanomas at a <i>p</i> value = 0.01<br>Down regulated genes in metastatic melanomas vs primary melanomas at a <i>p</i> value = 0.02<br>Down regulated genes in metastatic melanomas vs primary melanomas at a <i>p</i> value = 0.03<br>Down regulated genes in metastatic melanomas vs primary melanomas at a <i>p</i> value = 0.04<br>Down regulated genes in metastatic melanomas vs primary melanomas at a <i>p</i> value = 0.05<br>Oncogenes in melanoma | Jaeger et al. 2007        |
| Up regulated genes associated with neural crest, melanocytic development, differentiation and pigmentation and Downregulated genes associated with angiogenesis, neurogenesis, immunomodulation, interaction and remodeling of extracellular environment<br>Down regulated genes associated with neural crest, melanocytic development, differentiation and pigmentation and Upregulated genes associated with angiogenesis, neurogenesis, immunomodulation, interaction and remodeling of extracellular environment                                                                                                                                                                                                                                          | Jeffs et al. 2009         |
| Up regulated genes in melanomas with good prognosis<br>Down regulated genes in melanomas with good prognosis                                                                                                                                                                                                                                                                                                                                                                                                                                                                                                                                                                                                                                                  | John et al. 2008          |
| Genes with increased expression in melanomas of patients with prolonged survival<br>Genes with increased expression in melanomas of patients with short survival                                                                                                                                                                                                                                                                                                                                                                                                                                                                                                                                                                                              | Mandruzzato et al. 2006   |
| Up regulated genes in melanoma MGP cells vs melanocytes<br>Up regulated genes in advanced melanomas<br>Down regulated genes in advanced melanomas                                                                                                                                                                                                                                                                                                                                                                                                                                                                                                                                                                                                             | Pfaff Smith et al. 2005   |
| Up regulated genes in metastatic melanomas<br>Genes with high expression in primary cutaneous melanomas vs melanocytes<br>Genes with high expression in metastatic melanomas vs melanocytes<br>Down regulated genes in metastatic melanomas<br>Genes with low expression in primary cutaneous melanomas vs melanocytes<br>Genes with low expression in metastatic melanomas vs melanocytes<br>Genes with decreased expression in metastatic melanomas vs primary cutaneous melanomas<br>Tumor supresor genes in melanoma                                                                                                                                                                                                                                      | Riker et al. 2008         |
| Up regulated genes in vertical growth vs radial growth<br>Down regulated genes in aggressive melanomas                                                                                                                                                                                                                                                                                                                                                                                                                                                                                                                                                                                                                                                        | Ryu et al. 2007           |
| Gene markers of melanoma                                                                                                                                                                                                                                                                                                                                                                                                                                                                                                                                                                                                                                                                                                                                      | Schramm et al. 2011       |
| Overexpressed genes in melanoma                                                                                                                                                                                                                                                                                                                                                                                                                                                                                                                                                                                                                                                                                                                               | Talantov et al. 2005      |
| Molecular gene signature of metastatic melanomas                                                                                                                                                                                                                                                                                                                                                                                                                                                                                                                                                                                                                                                                                                              | Wang et al. 2012          |
| Up regulated genes in positive metastasis<br>Down regulated in positive metastasis                                                                                                                                                                                                                                                                                                                                                                                                                                                                                                                                                                                                                                                                            | Winnepeninckx et al. 2006 |
